# Supplementary material for: Implant Composed of Demineralized Bone and Mesenchymal Stem Cells Genetically Modified with AdBMP2/AdBMP7 for the Regeneration of Bone Fractures in Ovis aries
Source: Hindawi journal article supplement (doi:10.1155/2016/7403890), 2016-01-01
Supplement: f1 [file 7403890.f1.pdf]

**Table S1.** Primers used in this study for qPCR analysis.

| Marker | Sequence                   |
|--------|----------------------------|
| CD34   | 5'-GGTGGCTGATACCGAACTGT-3' |
|        | 5'-TCAGCATCTTGGCTGTATGC-3' |
| CD45   | 5'-CCACGGGTATTCAGCAAGTT-3' |
|        | 5'-CCCAGATCATCCTCCAGAAA-3' |
| CD116  | 5'-CGCAATGCAACAGGAGACTA-3' |
|        | 5'-GGCTAGATCGAAGCTTGACG-3' |
| CD73   | 5'-CTGAGACACCCGGATGAGAT-3' |
|        | 5'-ACTGGACCAGGTCAAAGGTG-3' |
| GAPDH  | 5'-GTTGTCAGCAATGCCTCCT-3'  |
|        | 5'-AAGCAGGGATGATGTTTTGG-3' |
| OC     | 5'-GCAGCGAGGTGGTG-3'       |
|        | 5'-CTCCTGGAAGCCGATGTG-3'   |
| Col I  | 5'-GGTGACAGGAAGTCCCAGAA-3' |
|        | 5'-CCATCGTAGGTGACGCTGTA-3' |
